# Supplementary material
Source: PubMed Central journal article supplement (PMC9767447)
Supplement: mmc1.pdf [file mmc1.pdf]

# THE LANCET

## Gastroenterology & Hepatology

### Supplementary appendix

This appendix formed part of the original submission and has been peer reviewed. We post it as supplied by the authors.

Supplement to: Solomon S S, Wagner-Cardoso S, Smeaton L, et al. A minimal monitoring approach for the treatment of hepatitis C virus infection (ACTG A5360 [MINMON]): a phase 4, open-label, single-arm trial. *Lancet Gastroenterol Hepatol* 2022; published online Jan 10. [https://doi.org/10.1016/S2468-1253\(21\)00397-6](https://doi.org/10.1016/S2468-1253(21)00397-6).

## **SUPPLEMENTARY MATERIALS**

### **Table of Contents**

|                                                                                        |   |
|----------------------------------------------------------------------------------------|---|
| Study Sites and Teams .....                                                            | 2 |
| Supplementary Figure 1. Study sites participating in the ACTG A5360 MINMON trial.....  | 4 |
| Supplementary Table 1. Recruitment by Study Site .....                                 | 5 |
| Supplementary Table 2. Unplanned Study Visits .....                                    | 6 |
| Supplementary Table 3. Serious Adverse Events Reported Between Entry and Week 28 ..... | 7 |

## Study Sites and Teams

Amy K. Sbrolla and Connor Reynolds from Massachusetts General Hospital (CRS: 101; CRS Grant: UM1AI069412). Paul Sax and Cheryl Keenan from Brigham and Women's Hospital (CRS: 107; CRS Grant: UM1AI069412). Ilene Wiggins and Juhi Moon from Johns Hopkins University (CRS: 201; CRS Grant: UM1AI069465). Debika Bhattacharya and Samantha Fortier from UCLA CARE Center (CRS: 601; CRS Grant: 2UM1AI069424). Steven Hendrickx and Mark Fernandez from UCSD Antiviral Research Center (CRS: 701; CRS Grant: UM1AI069432). Jay Dwyer and Daniel Berner from UCSF AIDS (CRS: 801; CRS Grant: UCLA MCA 20190973). Jen Sullivan and Amanda Saylor from University of Pittsburgh (CRS: 1001; CRS Grant: U01AI06949402). Noah Wald-Dickler and Connie Funk from University of Southern California (CRS: 1201; CRS Grant: 5UM1AI069432). Teresa Spitz and Michael Royal from Washington University (CRS: 2101; CRS Grant: UM1AI069439). Carlos Malvestutto and Mark Hite from Ohio State University Medical Center (CRS: 2301; CRS Grant: UM1AI069494). Carl J. Fichtenbaum and Michelle Saemann from Cincinnati (CRS: 2401; CRS Grant: UM1AI069501). Donald Anthony and Carla Hernandez from Case Western (CRS: 2501; CRS Grant: AI069501). Claudia Hawkins and Sherrie Wolfe from Northwestern University (CRS: 2701; CRS Grant: 5UM1 AI069471). Beverly E. Sha and Rebecca Lai from Rush University Medical Center (CRS: 2702; CRS Grant: U01 AI069471). Pamela Poethke and Karen Tashima from The Miriam Hospital (CRS: 2951; CRS Grant: AI069412). Jonathan Oakes and Nazneen Howerton from UNC Chapel Hill (CRS: 3201; CRS Grants: 5UM1AI068636, 2UM1AI069423, and UL1TR002489). Cornelius N. Van Dam and Kimberley Epperson from Greensboro (CRS: 3203; CRS Grant: 2UM1AI069423). Frederick Nicotera and Tracey Watkins from Vanderbilt (CRS: 3652; CRS Grants: AI069439 and TR002243). Jorge L. Santana and Sigrid Perez-Fronteras from Puerto Rico AIDS Clinical Trials Unit (PR-AIDS) (CRS: 5401; CRS Grant: 5UM1AI069415). Lesley Miller and Ericka R. Patrick from Emory-CDC Ponce Clinical Research Site (CRS: 5802; CRS Grants: UM1AI69418 and P30A1050409). Andrew Lauria and Suzanne Fiorillo from University of Colorado Hospital (CRS: 6101; CRS Grants: UM1 AI 69432 and UL1 TR002535). Eileen Donaghy and Yan Jiang from Penn Therapeutics (CRS: 6201; CRS Grant: UM1 AI069534). Rebecca Fry and Jiamin Li from Weill Cornell Uptown (CRS: 7803; CRS Grants: 5UM1AI069419 and UL1TR000457). Valery Hughes and Shaun Barcavage from Weill Cornell Chelsea (CRS: 7804; CRS Grants: 5UM1AI069419 and UL1TR000457). Lynne Cornelissen and Lindee Ganger from Family Centre for Research with Ubuntu, Stellenbosch University, Cape Town, South Africa (CRS: 8950; CRS Grants: 2UM1AI068636 and

Gilead/MGH UM1AI068636). Jaclyn Bennet and Sharlaa Badal-Faesen from Wits Helen Joseph (CRS: 11101; CRS Grants: AI069463 and AI068636). Alessandro Nascimento and Hugo Perazzo from the Instituto de Pesquisa Clínica Evandro Chagas (IPEC) (CRS: 12101; CRS Grant: UM1AI069476). Rita de Cassia Alevés Lira and Andre Luis Machado da Silva from Hospital Nossa Senhora da Conceição, Brazil (CRS: 12201; CRS Grant: AI069424). Samuel Kawuma and Francis Ssali from JCRC Kampala CRS (CRS: 12401; CRS Grant: UM1AI069501). Jolene Noel-Connor and Matthew Scherer from Columbia P&S (CRS: 30329; CRS Grant: UM1AI069470). Roger J. Bedimo and Jennifer Klein from Trinity Health & Wellness (CRS: 31443; CRS Grant: UM1AI069471). Roberto C. Arduino and Martine M. Diez from HART (CRS: 31473; CRS Grants: UM1AI069432 and UM1AI068636). Sarah Henn and David Klein from Whitman-Walker Institute (CRS: 31781; CRS Grant: UM1AI069465). Patcharaphan Sugandhavesa and Daralak Tavornprasit from CMU HIV Treatment (CRS: 31784; CRS Grant: UM1AI068636). Debra Chew and Valerie Cadorett from Rutgers New Jersey Medical School (CRS: 31786; CRS Grant: AI69419). Peter Mariuz and Catherine A. Bunce from University of Rochester Adult HIV Therapeutic Strategies (CRS: 31787; CRS Grant: UM1AI069511). Edgar Turner Overton and Olivia Hogue from Alabama CRS (CRS: 31788; CRS Grant: UM1AI069452). Kiat Ruxrungham and Sivaporn Gatechompol from Thai Red Cross AIDS Research Centre (TRC-ARC) (CRS: 31802; CRS Grant: UM1AI069399).

**Supplementary Figure 1. Study sites participating in the ACTG A5360 MINMON trial.**

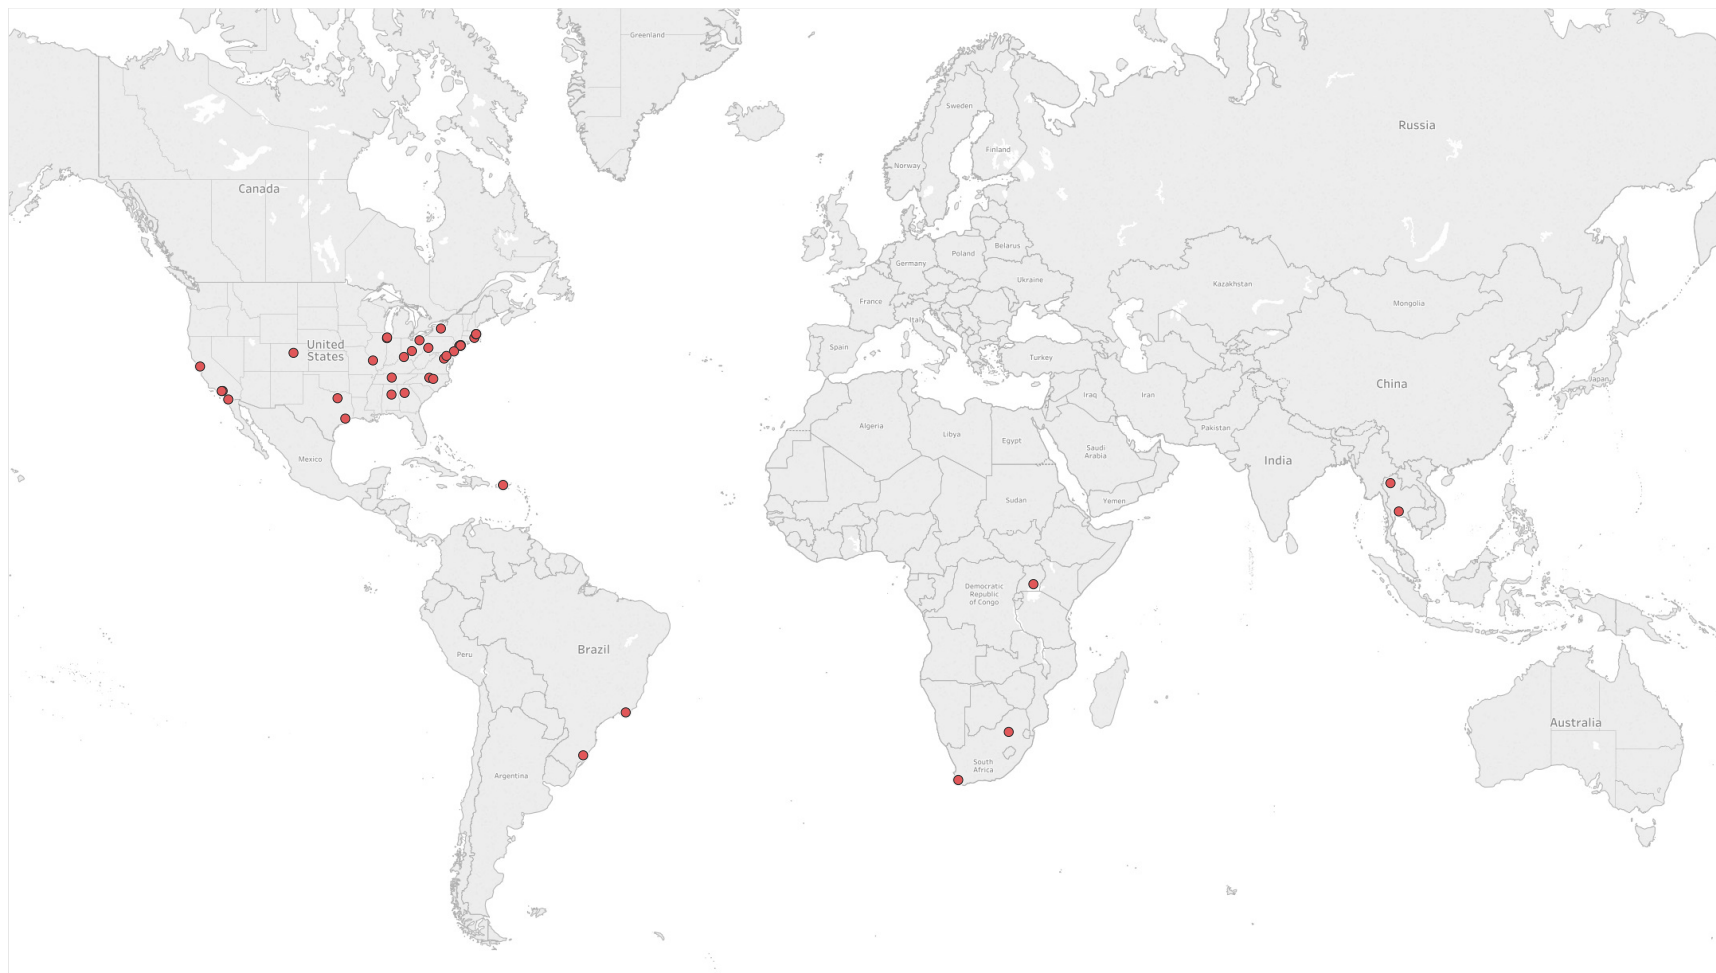

**Supplementary Table 1. Recruitment by Study Site**

| <b>Site Name</b>                                                          | <b>Number of participants recruited</b> |
|---------------------------------------------------------------------------|-----------------------------------------|
| Hospital Nossa Senhora da Conceicao, Brazil                               | 68                                      |
| Instituto de Pesquisa Clinica Evandro Chagas, Brazil                      | 63                                      |
| Thai Red Cross AIDS Research Centre (TRC-ARC), Thailand                   | 61                                      |
| Chiang Mai University HIV Treatment (CMU HIV Treatment), Thailand         | 49                                      |
| Joint Clinical Research Center (JCRC) Kampala, Uganda                     | 15                                      |
| University of the Witwatersrand Helen Joseph (WITS HJH) CRS, South Africa | 8                                       |
| Penn Therapeutics, USA                                                    | 8                                       |
| Puerto Rico AIDS Clinical Trials Unit, USA                                | 7                                       |
| Johns Hopkins University, USA                                             | 5                                       |
| University of California, San Diego AntiViral Research Center, USA        | 5                                       |
| Family Clinical Research Unit (FAM-CRU), South Africa                     | 4                                       |
| University of Alabama, USA                                                | 4                                       |
| Brigham and Women's Hospital Therapeutics (BWHT), USA                     | 4                                       |
| Case Western Reserve University, USA                                      | 4                                       |
| University of North Carolina, Chapel Hill, USA                            | 4                                       |
| University of Cincinnati, USA                                             | 4                                       |
| Columbia Physicians and Surgeons (P and S), USA                           | 4                                       |
| Greensboro, USA                                                           | 4                                       |
| Houston AIDS Research Team (HART), USA                                    | 4                                       |
| Massachusetts General Hospital (MGH), USA                                 | 4                                       |
| New Jersey Medical School Clinical Research Center, USA                   | 4                                       |
| Northwestern University, USA                                              | 4                                       |
| Ohio State University, USA                                                | 4                                       |
| Rush University, USA                                                      | 4                                       |
| The Miriam Hospital (TMH), USA                                            | 4                                       |
| Trinity Health and Wellness Center, USA                                   | 4                                       |
| University of California, Los Angeles CARE Center, USA                    | 4                                       |
| University of California, San Francisco HIV/AIDS, USA                     | 4                                       |
| University of Colorado Hospital, USA                                      | 4                                       |
| University of Pittsburgh, USA                                             | 4                                       |
| University of Rochester Adult HIV Therapeutic Strategies Network, USA     | 4                                       |
| University of Southern California, USA                                    | 4                                       |
| Vanderbilt Therapeutics (VT), USA                                         | 4                                       |
| Washington University Therapeutics (WT), USA                              | 4                                       |
| Weill Cornell Chelsea, USA                                                | 4                                       |
| Weill Cornell Uptown, USA                                                 | 4                                       |
| Whitman Walker Health, USA                                                | 4                                       |
| The Ponce de Leon Center, USA                                             | 3                                       |

**Supplementary Table 2. Unplanned Study Visits**

| Country      | Age in years | Sex at birth | Days since SOF/VEL initiation | Reason for visit                                                                                              | Visit related to a reportable Adverse Event | Visit resulted in SOF/VEL discontinuation | Sustained Virologic Response |
|--------------|--------------|--------------|-------------------------------|---------------------------------------------------------------------------------------------------------------|---------------------------------------------|-------------------------------------------|------------------------------|
|              |              |              | 1                             | Grade 4 sodium abnormality detected at entry                                                                  | No                                          | No                                        |                              |
| South Africa | 67           | Male         | 4                             | Repeat sodium                                                                                                 | No                                          | No                                        | Yes                          |
|              |              |              | 11                            | Repeat sodium                                                                                                 | No                                          | No                                        |                              |
| Thailand     | 27           | Male         | 5                             | Follow-up of liver function test                                                                              | No                                          | No                                        | Yes                          |
| USA          | 53           | Male         | 5                             | Symptoms of upper respiratory infection                                                                       | Yes                                         | No                                        | Yes                          |
| Uganda       | 51           | Male         | 7                             | Participant felt unwell                                                                                       | No                                          | No                                        | Yes                          |
| Uganda       | 49           | Male         | 13                            | Participant complained of frequent micturition                                                                | No                                          | No                                        | Yes                          |
| Uganda       | 31           | Male         | 22                            | Participant complained of headache and dizziness                                                              | No                                          | No                                        | Yes                          |
| Brazil       | 63           | Female       | 34                            | Community acquired pneumonia                                                                                  | No                                          | No                                        | Yes                          |
|              |              |              | 46                            | Clarification about treatment                                                                                 | No                                          | No                                        |                              |
| Brazil       | 35           | Male         | 40                            | Papular rash                                                                                                  | No                                          | No                                        | Yes                          |
|              |              |              | 43                            | Rash on face and thorax                                                                                       | No                                          | No                                        |                              |
| Thailand     | 42           | Male         | 43                            | Repeat AST/ALT from previous visit                                                                            | No                                          | No                                        | Yes                          |
|              |              |              | 48                            | Participant complained of weakness                                                                            | Yes                                         | No                                        |                              |
| South Africa | 51           | Female       | 49                            | Participant requested to visit site to repeat hemogram                                                        | No                                          | No                                        | Yes                          |
|              |              |              | 50                            | Participant came to site for counseling and administration of vitamin B12 for management of pernicious anemia | No                                          | No                                        |                              |
| Thailand     | 30           | Male         | 48                            | Repeat AST/ALT                                                                                                | No                                          | No                                        | Yes                          |
| USA          | 59           | Male         | 72                            | Blood evaluations to evaluate dizziness and other symptoms                                                    | No                                          | No                                        | Yes                          |
| Thailand     | 34           | Male         | 85                            | Participant diagnosed with HIV and wanted to start antiretroviral therapy                                     | No                                          | No                                        | Yes                          |
| Brazil       | 63           | Female       | 96                            | Grade 2 rash                                                                                                  | Yes                                         | No                                        | Yes                          |
| USA          | 59           | Female       | 151                           | Participant came in early for study visit                                                                     | No                                          | No                                        | No                           |

**Supplementary Table 3. Serious Adverse Events Reported Between Entry and Week 28**

| Country      | Days since SOF/VEL initiation | Description of SAE              | Toxicity Grade | Related to SOF/VEL | Resulted in SOF/VEL discontinuation | SAE outcome |
|--------------|-------------------------------|---------------------------------|----------------|--------------------|-------------------------------------|-------------|
| USA          | 20                            | Respiratory Failure             | 3              | No                 | No                                  | Recovered   |
| South Africa | 48                            | Anemia                          | 4              | No                 | No                                  | Recovered   |
| Thailand     | 53                            | Drug overdose                   | 3              | No                 | No                                  | Recovered   |
| Thailand     | 65                            | Dyspepsia                       | 3              | No                 | No                                  | Recovered   |
| Thailand     | 67                            | Pneumonia                       | 3              | No                 | No                                  | Recovered   |
| USA          | 89                            | Depression                      | 3              | No                 | Not applicable*                     | Resolving   |
| Thailand     | 101                           | Acute myocardial infarction     | 4              | No                 | Not applicable*                     | Recovered   |
| USA          | 127                           | Acute right ventricular failure | 3              | No                 | Not applicable*                     | Recovered   |
| Thailand     | 131                           | Diverticular perforation        | 3              | No                 | Not applicable*                     | Recovered   |
| USA          | 148                           | Hypertension                    | 3              | No                 | Not applicable*                     | Recovered   |
| South Africa | 157                           | Seizure                         | 3              | No                 | Not applicable*                     | Recovered   |
| USA          | 168                           | Acute kidney injury             | 3              | No                 | Not applicable*                     | Recovered   |
| USA          | 178                           | Urinary tract infection         | 3              | No                 | Not applicable*                     | Recovered   |
| USA          | 193                           | Suicidal ideation               | 3              | No                 | Not applicable*                     | Recovered   |

\*Not applicable as study medication was completed
